# Supplementary material for: Knockout of MYOM1 in human cardiomyocytes leads to myocardial atrophy via impairing calcium homeostasis
Source: PubMed Central journal article supplement (PMC7875908; doi:10.1111/jcmm.16268), 2021-01-15

# FIGURE S7

**A**

5'...AGAATTAAGAAGCTGCTGCTTATATAGCCCAGAGGAATCTT... 3'  
3'...TCTTAATTTCTTCGACGACGAATATATCGGGTCCTTAGAA... 5'

#2 AGAATTAAGAAGCTGCTGCTTATATAGC--AGAGGAATCTT -2bp  
#7 AGAATTAAGAAGCTGCTGCTTATATAGCCCCAGAGGAATCTT +1bp  
#12 AGAATTAAGAAGCTGCTGCTTAT-----CCAGAGGAATCTT -5bp

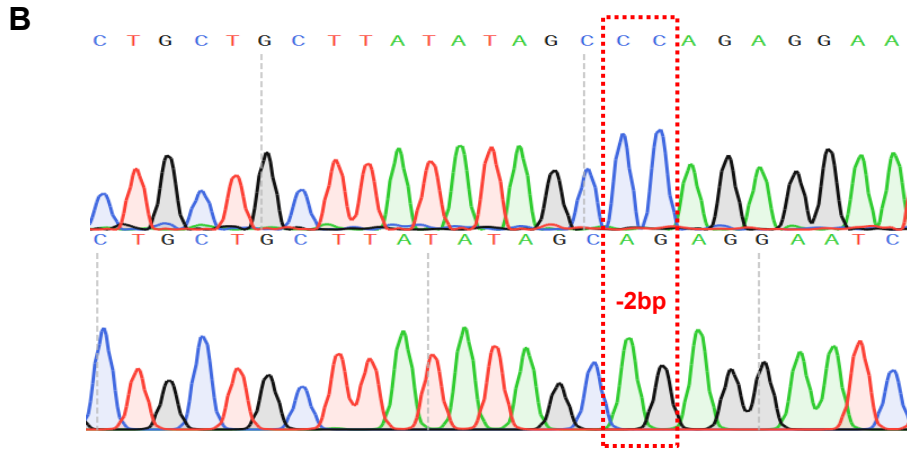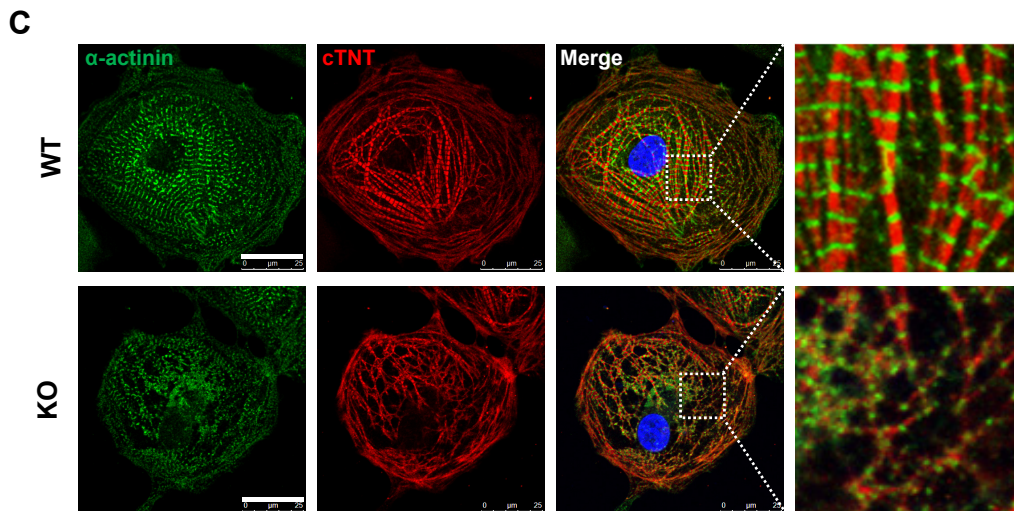

Supplement: JCMM-25-1661-s007.pdf [file JCMM-25-1661-s007.pdf]
